# Supplementary material
Source: Springer Nature journal article supplement (https://www.springermedizin.de/resource/supplementary/12865_2008_255_MOESM4_ESM.pdf/9427610)

## (a) Adult DCs

### FasL

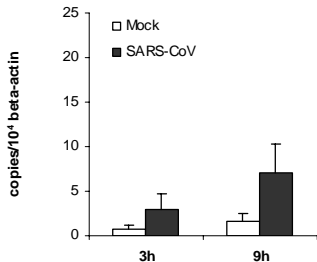

### TRAIL

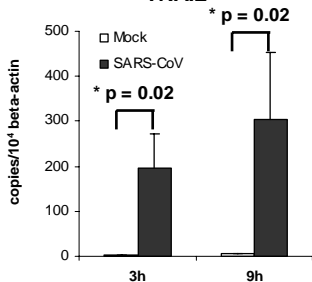

## (b) CB DCs

### FasL

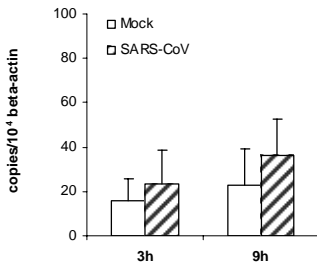

### TRAIL

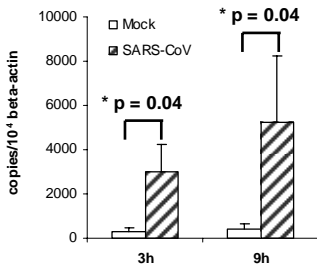

Supplement: MOESM4 [file 9427610]
